# Supplementary material
Source: publisher figshare collection journal article supplement (https://geolsoc.figshare.com/ndownloader/files/30703146)
Supplement: Supplementary file 1 [file 30703146]

## Sheet: A
																	Mean roundness vs. grain-size - Alicudi (left), Filicudi (right).
																	a) mean roundness degree among all grain types.
																	b) grain–size vs. mean roundness discriminated by the different volcanic lithic fragments;
																	c) grain–size vs. mean roundness discriminated by single crystal grains.

## Sheet: B
																		Mean roundness vs. grain-size - Panarea (left), Salina (right).
																		a) mean roundness degree among all grain types.
																		b) grain–size vs. mean roundness discriminated by the different volcanic lithic fragments;
																		c) grain–size vs. mean roundness discriminated by single crystal grains.

## Sheet: C
																		Mean roundness vs. grain-size - Stromboli beach sand (left), Stromboli crater sand (right).
																		a) mean roundness degree among all grain types.
																		b) grain–size vs. mean roundness discriminated by the different volcanic lithic fragments;
																		c) grain–size vs. mean roundness discriminated by single crystal grains.
